# Supplementary material for: Construction of Z-scheme heterojunction interfacial charge transfer pathways in ZnIn2S4@NENU-5 for photocatalytic hydrogen evolution
Source: Royal Society of Chemistry journal article supplement (doi:10.1039/d4nr02587c), 2024-01-01
Supplement: d4nr02587c1.pdf [file d4nr02587c1.pdf]

## Supporting Information

### Construction of Z-scheme heterojunction interfacial charge transfer pathways in ZnIn<sub>2</sub>S<sub>4</sub>@NENU-5 for photocatalytic hydrogen evolution

Xu Kong<sup>1,2,3</sup>, Kai Wang<sup>1,2,3\*</sup>, Hai Yu<sup>1,2,3</sup>, Zhiliang Jin<sup>1,2,3</sup>

*1. School of Chemistry and Chemical Engineering, North Minzu University, Yinchuan 750021, P.R.China*

*2. Ningxia Key Laboratory of Solar Chemical Conversion Technology, North Minzu University, Yinchuan 750021, P.R.China*

*3. Key Laboratory for Chemical Engineering and Technology, State Ethnic Affairs Commission, North Minzu University, Yinchuan 750021, P.R.China*

\*Corresponding author: [kaiwang@nun.edu.cn](mailto:kaiwang@nun.edu.cn) (K. Wang)

### AQE measurement:

The apparent quantum efficiency (AQE) for the photocatalytic hydrogen evolution from the sample was measured under the irradiation of 300 W Xe lamps at various monochromatic wavelengths (450 nm, 475 nm, 500 nm, 520 nm, and 550 nm), the AQE was then calculated using the following equation:

$$AQE = \frac{2 \times \text{the number of evolved hydrogen molecules}}{\text{the number of incident photons}} \times 100\%$$

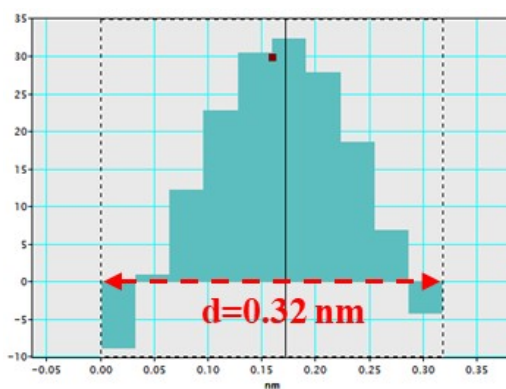

Fig. S1. Parameters of the lattice within the area of Fig. 2f

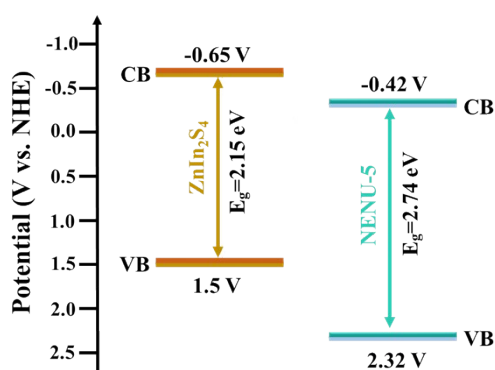

Fig. S2. band structures of NENU-5 NOs and ZnIn<sub>2</sub>S<sub>4</sub> NFs.

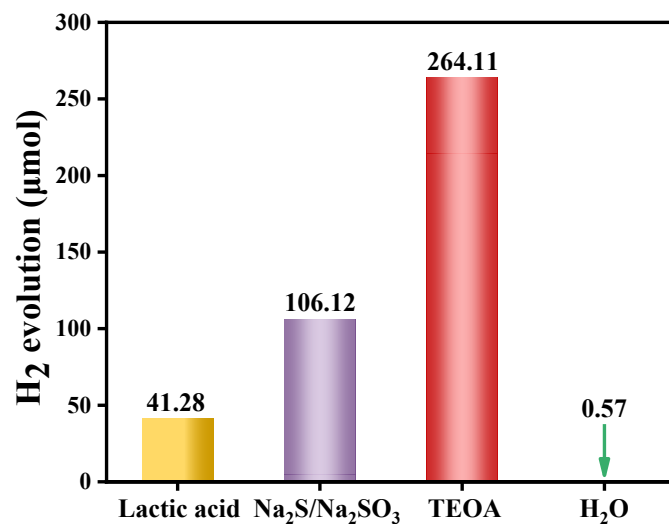

Fig. S3. H<sub>2</sub> evolution of the ZnIn<sub>2</sub>S<sub>4</sub>@10%NENU-5 in different sacrificial reagents.

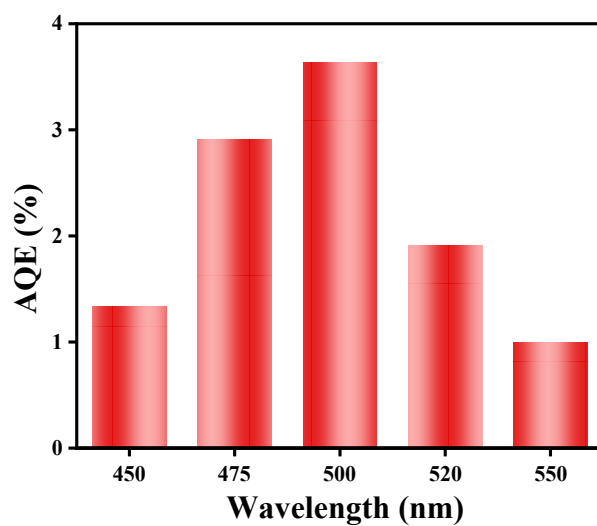

Fig. S4. Apparent quantum efficiency (AQE) of the ZnIn<sub>2</sub>S<sub>4</sub>@10%NENU-5.

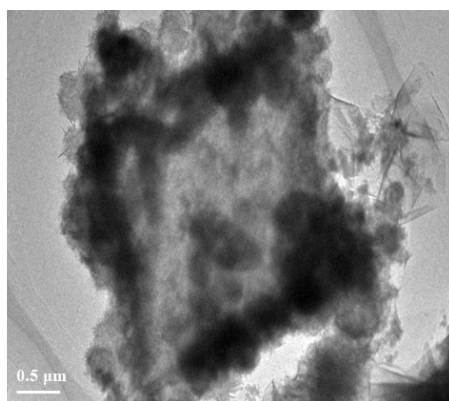

Fig. S5. TEM images of ZnIn<sub>2</sub>S<sub>4</sub>@NENU-5 heterostructures after photocatalytic reaction.

**Table S1.** Parameters of physical adsorption

| Samples                              | $S_{\text{BET}}$ ( $\text{m}^2\text{g}^{-1}$ ) | Pore volume ( $\text{cm}^3\text{g}^{-1}$ ) | Average pore size (nm) |
|--------------------------------------|------------------------------------------------|--------------------------------------------|------------------------|
| NENU-5 NOs                           | 547.02                                         | 0.22                                       | 6.13                   |
| ZnIn <sub>2</sub> S <sub>4</sub> NFs | 65.29                                          | 0.23                                       | 12.29                  |
| ZIS@10%NENU-5                        | 101.39                                         | 0.34                                       | 11.96                  |

**Table S2.** Comparison of photocatalytic hydrogen evolution rate of ZnIn<sub>2</sub>S<sub>4</sub> based photocatalysts.

| Photocatalysts                                                                         | Light sources | Sacrificia l reagent                              | AQE (%) @wavelength | Activity ( $\mu\text{mol}\cdot\text{g}^{-1}\text{h}^{-1}$ ) | Ref.      |
|----------------------------------------------------------------------------------------|---------------|---------------------------------------------------|---------------------|-------------------------------------------------------------|-----------|
| ZnIn <sub>2</sub> S <sub>4</sub> @NENU-5                                               | 5 W LED       | TEOA                                              | 500 nm 3.64%        | 5282.14                                                     | This work |
| ZnIn <sub>2</sub> S <sub>4</sub> /MoS <sub>2</sub>                                     | 150 W Xe lamp | Na <sub>2</sub> S/Na <sub>2</sub> SO <sub>3</sub> | 532 nm 0.19%        | 200.1                                                       | [S1]      |
| FeIn <sub>2</sub> S <sub>4</sub> @ZnIn <sub>2</sub> S <sub>4</sub>                     | 300 W Xe lamp | Na <sub>2</sub> S/Na <sub>2</sub> SO <sub>3</sub> | 420 nm 3.69%        | 4210                                                        | [S2]      |
| NiTiO <sub>3</sub> /ZnIn <sub>2</sub> S <sub>4</sub>                                   | 3X 30W LED    | TEOA                                              | 450 nm 4.39%        | 4430                                                        | [S3]      |
| MIL-68(In)@ZnIn <sub>2</sub> S <sub>4</sub>                                            | 300 W Xe lamp | TEOA                                              | 400 nm 0.70%        | 9090                                                        | [S4]      |
| MoO <sub>2</sub> /C@ZnIn <sub>2</sub> S <sub>4</sub>                                   | 300 W Xe lamp | TEOA                                              | 400 nm 2.96%        | 2357                                                        | [S5]      |
| Ti <sub>3</sub> C <sub>2</sub> /ZnIn <sub>2</sub> S <sub>4</sub> /CdS                  | 300 W Xe lamp | TEOA                                              | 450 nm 3.42%        | 8930                                                        | [S6]      |
| BP@ZnIn <sub>2</sub> S <sub>4</sub>                                                    | 300 W Xe lamp | Na <sub>2</sub> S/Na <sub>2</sub> SO <sub>3</sub> | 450 nm 0.25%        | 1278                                                        | [S7]      |
| Ni <sub>1-x</sub> Co <sub>x</sub> Se <sub>2</sub> -C /ZnIn <sub>2</sub> S <sub>4</sub> | 300 W Xe lamp | TEOA                                              | 420 nm 2.32%        | 5099                                                        | [S8]      |
| ZnIn <sub>2</sub> S <sub>4</sub> @NH <sub>2</sub> -MIL-125(Ti)                         | 300 W Xe lamp | Na <sub>2</sub> S/Na <sub>2</sub> SO <sub>3</sub> | 420 nm 4.30%        | 2204                                                        | [S9]      |

**Table S3.** Attenuation parameters of all samples.

| Sample                               | $\tau_1$ [ns]  | $\tau_2$ [ns]  | $\tau_3$ [ns] | $\tau_{ave}$ [ns] |
|--------------------------------------|----------------|----------------|---------------|-------------------|
| NENU-5 NOs                           | 2.117 (11.80%) | 0.048 (83.74%) | 11.754(4.45%) | 0.057             |
| ZnIn <sub>2</sub> S <sub>4</sub> NFs | 2.204(10.50%)  | 13.137 (3.89%) | 0.056(85.61%) | 0.065             |
| ZIS@10%NENU-5                        | 2.222(11.59%)  | 0.083 (83.95%) | 12.849(4.46%) | 0.098             |

## References

- [S1] W. Pudkon, H. Bahruji, P. J. Miedziak, T. E. Davies, D. J. Morgan, S. Pattison, S. Kaowphong and G. J. Hutchings, Enhanced visible-light-driven photocatalytic H<sub>2</sub> production and Cr(VI) reduction of a ZnIn<sub>2</sub>S<sub>4</sub>/MoS<sub>2</sub> heterojunction synthesized by the biomolecule-assisted microwave heating method, *Catal. Sci. Technol.*, 2020, **10**, 2838-2854.
- [S2] Fan Q, Yan Z, Li J, et al. Interfacial-electric-field guiding design of a Type-I FeIn<sub>2</sub>S<sub>4</sub>@ZnIn<sub>2</sub>S<sub>4</sub> heterojunction with ohmic-like charge transfer mechanism for highly efficient solar H<sub>2</sub> evolution, *Appl. Surf. Sci.*, 2024, **663**, 160206.
- [S3] S. Dhingra, M. Sharma, V. Krishnan and C. Nagaraja, Design of noble metal-free NiTiO<sub>3</sub>/ZnIn<sub>2</sub>S<sub>4</sub> heterojunction photocatalyst for efficient visible-light-assisted production of H<sub>2</sub> and selective synthesis of 2, 5-Bis (hydroxymethyl) furan, *J. Colloid Interface Sci.*, 2022, **615**, 346-356.
- [S4] M. Tan, C. Yu, H. Zeng, C. Liu, W. Dong, H. Meng, Y. Sua, L. Qiaoa, L. Gaoa, Q. Luc and Y. Bai, In situ fabrication of MIL-68(In)@ZnIn<sub>2</sub>S<sub>4</sub> heterojunction for enhanced photocatalytic hydrogen production, *Nanoscale*, 2023, **15**, 2425-2434.
- [S5] X. Zhang, H. Ye, Z. Zeng, K. Sa, J. Jia, Z. Yang and S. Xu, Chuang Han, Yujun Liang, Bridging the gap between metallic MoO<sub>2</sub> and ZnIn<sub>2</sub>S<sub>4</sub> for enhanced photocatalytic H<sub>2</sub> production, *Sep. Purif. Technol.*, 2024, **347**, 127624.
- [S6] J. Bai, W. Chen, R. Shen, Z. Jiang, P. Zhang, W. Liu and X. Li, Regulating interfacial morphology and charge-carrier utilization of Ti<sub>3</sub>C<sub>2</sub> modified all-sulfide CdS/ZnIn<sub>2</sub>S<sub>4</sub> S-scheme heterojunctions for effective photocatalytic H<sub>2</sub> evolution, *J. Mater. Sci. Technol.*, 2022, **112**, 85-95.
- [S7] Q. Zhanga, J. Zhanga, L. Zhanga, M. Caoa, F. Yanga and W. L. Dai, Facile construction of flower-like black phosphorus nanosheet@ZnIn<sub>2</sub>S<sub>4</sub> composite with highly efficient catalytic performance in hydrogen production, *Appl. Surf. Sci.*, 2020, **504**, 144366.
- [S8] Y. Chao, P. Zhou, J. Lai, W. Zhang, H. Yang, S. Lu, H. Chen, K. Yin, M. Li, Lu Tao, C. Shang, M. Tong and S. Guo, Ni<sub>1-x</sub>Co<sub>x</sub>Se<sub>2</sub>-C/ZnIn<sub>2</sub>S<sub>4</sub> Hybrid Nanocages with Strong 2D/2D Hetero-Interface Interaction Enable Efficient H<sub>2</sub>-Releasing

Photocatalysis, *Adv. Funct. Mater.*, 2021, **31**, 2100923.

[S9] H. Liu, J. Zhang and D. Ao, Construction of heterostructured ZnIn<sub>2</sub>S<sub>4</sub>@NH<sub>2</sub>-MIL-125 (Ti) nanocomposites for visible-light-driven H<sub>2</sub> production, *Appl. Catal. B Environ. Energy*, 2018, **221**, 433-442.
